# Supplementary material for: Massive Transcriptional Perturbation in Subgroups of Diffuse Large B-Cell Lymphomas
Source: PubMed Central journal article supplement (PMC3817189; doi:10.1371/journal.pone.0076287), 2013-11-04
Supplement: pone.0076287.s019.pdf [file pone.0076287.s019.pdf]

| <b>Table S1. Incidence of biologic features in the CAPs.</b> |                 |     |                 |     |             |     |                |
|--------------------------------------------------------------|-----------------|-----|-----------------|-----|-------------|-----|----------------|
|                                                              | <b>HiGA-PRO</b> |     | <b>HiGA-SIR</b> |     | <b>LoGA</b> |     | <b>p-value</b> |
|                                                              | N = 106         |     | N = 189         |     | N = 69      |     |                |
| <b>Morphology</b>                                            | No.             | %   | No.             | %   | No.         | %   |                |
| centroblastic                                                | 59              | 56% | 118             | 62% | 37          | 54% |                |
| immunoblastic                                                | 5               | 5%  | 5               | 3%  | 6           | 9%  |                |
| plasmoblastic                                                | 8               | 8%  | 7               | 4%  | 4           | 6%  | 0.116          |
| NA                                                           | 34              | 32% | 59              | 31% | 22          | 32% |                |
| <b>Immunoblastic morphology</b>                              |                 |     |                 |     |             |     |                |
| neg                                                          | 59              | 56% | 118             | 62% | 37          | 54% |                |
| pos                                                          | 5               | 5%  | 5               | 3%  | 6           | 9%  | 0.079          |
| NA                                                           | 42              | 40% | 66              | 35% | 26          | 38% |                |
| <b>CD10 expression</b>                                       |                 |     |                 |     |             |     |                |
| neg                                                          | 72              | 68% | 121             | 64% | 36          | 52% |                |
| pos                                                          | 26              | 25% | 47              | 25% | 24          | 35% | 0.165          |
| NA                                                           | 8               | 8%  | 21              | 11% | 9           | 13% |                |
| <b>CD5 expression</b>                                        |                 |     |                 |     |             |     |                |
| neg                                                          | 92              | 87% | 136             | 72% | 51          | 74% |                |
| pos                                                          | 4               | 4%  | 26              | 14% | 5           | 7%  | 0.009          |
| NA                                                           | 10              | 9%  | 27              | 14% | 13          | 19% |                |
| <b>BCL2 expression</b>                                       |                 |     |                 |     |             |     |                |
| neg                                                          | 14              | 13% | 36              | 19% | 13          | 19% |                |
| pos                                                          | 87              | 82% | 126             | 67% | 50          | 72% | 0.231          |
| NA                                                           | 5               | 5%  | 27              | 14% | 6           | 9%  |                |
| <b>BCL6 expression</b>                                       |                 |     |                 |     |             |     |                |
| neg                                                          | 14              | 13% | 37              | 20% | 9           | 13% |                |
| pos                                                          | 79              | 75% | 123             | 65% | 50          | 72% | 0.219          |
| NA                                                           | 13              | 12% | 29              | 15% | 10          | 14% |                |
| <b>IRF4/MUM1 expression</b>                                  |                 |     |                 |     |             |     |                |
| neg                                                          | 17              | 16% | 57              | 30% | 15          | 22% |                |
| pos                                                          | 80              | 75% | 102             | 54% | 38          | 55% | 0.006          |
| NA                                                           | 9               | 8%  | 30              | 16% | 16          | 23% |                |
| <b>KI67 ≥ 90%</b>                                            |                 |     |                 |     |             |     |                |
| neg                                                          | 65              | 61% | 133             | 70% | 44          | 64% |                |
| pos                                                          | 34              | 32% | 39              | 21% | 19          | 28% | 0.094          |
| NA                                                           | 7               | 7%  | 17              | 9%  | 6           | 9%  |                |
| <b>GENE EXPRESSION</b>                                       |                 |     |                 |     |             |     |                |
| <b>GCB/ABC GEP</b>                                           |                 |     |                 |     |             |     |                |
| ABC                                                          | 43              | 41% | 46              | 24% | 17          | 25% |                |
| GCB                                                          | 34              | 32% | 100             | 53% | 43          | 62% | <0.001         |
| NA                                                           | 29              | 27% | 43              | 23% | 9           | 13% |                |
| <b>Consensus Cluster</b>                                     |                 |     |                 |     |             |     |                |
| BCR                                                          | 46              | 43% | 4               | 2%  | 25          | 36% |                |
| HR                                                           | 7               | 7%  | 29              | 15% | 19          | 28% |                |
| OxPhos                                                       | 10              | 9%  | 10              | 5%  | 0           | 0%  | <0.001         |
| NA                                                           | 43              | 41% | 146             | 77% | 25          | 36% |                |
| <b>PAP (details)</b>                                         |                 |     |                 |     |             |     |                |
| mind-L                                                       | 30              | 28% | 28              | 15% | 25          | 36% |                |
| PAP-1                                                        | 19              | 18% | 107             | 57% | 25          | 36% |                |
| PAP-2                                                        | 17              | 16% | 4               | 2%  | 18          | 26% |                |
| PAP-3                                                        | 26              | 25% | 22              | 12% | 0           | 0%  |                |
| PAP-4                                                        | 14              | 13% | 28              | 15% | 1           | 1%  | <0.001         |
| <b>PAP1 GEP</b>                                              |                 |     |                 |     |             |     |                |
| neg                                                          | 87              | 82% | 82              | 43% | 44          | 64% |                |
| pos                                                          | 19              | 18% | 107             | 57% | 25          | 36% | <0.001         |
| <b>GENETICS</b>                                              |                 |     |                 |     |             |     |                |
| <b>MYC-break</b>                                             |                 |     |                 |     |             |     |                |
| neg                                                          | 90              | 85% | 175             | 93% | 56          | 81% |                |
| pos                                                          | 13              | 12% | 10              | 5%  | 11          | 16% | 0.012          |

|                             |    |     |     |     |    |     |       |
|-----------------------------|----|-----|-----|-----|----|-----|-------|
| NA                          | 3  | 3%  | 4   | 2%  | 2  | 3%  |       |
| <b>MYC-status (details)</b> |    |     |     |     |    |     |       |
| IG-MYC                      | 2  | 2%  | 5   | 3%  | 4  | 6%  |       |
| neg                         | 90 | 85% | 175 | 93% | 56 | 81% |       |
| non-IG-MYC                  | 11 | 10% | 5   | 3%  | 7  | 10% | 0.011 |
| NA                          | 3  | 3%  | 4   | 2%  | 2  | 3%  |       |
| <b>IGH-BCL2 fusion</b>      |    |     |     |     |    |     |       |
| neg                         | 95 | 90% | 163 | 86% | 52 | 75% |       |
| pos                         | 9  | 8%  | 22  | 12% | 16 | 23% | 0.019 |
| NA                          | 2  | 2%  | 4   | 2%  | 1  | 1%  |       |
| <b>BCL6-break</b>           |    |     |     |     |    |     |       |
| neg                         | 71 | 67% | 134 | 71% | 55 | 80% |       |
| pos                         | 28 | 26% | 51  | 27% | 14 | 20% | 0.442 |
| NA                          | 7  | 7%  | 4   | 2%  | 0  | 0%  |       |
| <b>IGH-break</b>            |    |     |     |     |    |     |       |
| neg                         | 50 | 47% | 62  | 33% | 39 | 57% |       |
| pos                         | 23 | 22% | 23  | 12% | 12 | 17% | 0.628 |
| NA                          | 33 | 31% | 104 | 55% | 18 | 26% |       |
| <b>IRF4-break</b>           |    |     |     |     |    |     |       |
| neg                         | 40 | 38% | 69  | 37% | 27 | 39% |       |
| pos                         | 4  | 4%  | 2   | 1%  | 1  | 1%  | 0.344 |
| NA                          | 62 | 58% | 118 | 62% | 41 | 59% |       |
| <b>EZH2 mutation</b>        |    |     |     |     |    |     |       |
| neg                         | 94 | 89% | 165 | 87% | 49 | 71% |       |
| pos                         | 5  | 5%  | 13  | 7%  | 9  | 13% | 0.068 |
| NA                          | 7  | 7%  | 11  | 6%  | 11 | 16% |       |
| <b>+1q21</b>                |    |     |     |     |    |     |       |
| neg                         | 68 | 64% | 130 | 69% | 29 | 42% |       |
| pos                         | 19 | 18% | 15  | 8%  | 12 | 17% | 0.004 |
| NA                          | 19 | 18% | 44  | 23% | 28 | 41% |       |
| <b>+2p16</b>                |    |     |     |     |    |     |       |
| neg                         | 68 | 64% | 122 | 65% | 24 | 35% |       |
| pos                         | 19 | 18% | 23  | 12% | 17 | 25% | 0.003 |
| NA                          | 19 | 18% | 44  | 23% | 28 | 41% |       |
| <b>+3q27</b>                |    |     |     |     |    |     |       |
| neg                         | 64 | 60% | 126 | 67% | 30 | 43% |       |
| pos                         | 23 | 22% | 19  | 10% | 11 | 16% | 0.018 |
| NA                          | 19 | 18% | 44  | 23% | 28 | 41% |       |
| <b>+6p25</b>                |    |     |     |     |    |     |       |
| neg                         | 73 | 69% | 115 | 61% | 32 | 46% |       |
| pos                         | 14 | 13% | 30  | 16% | 9  | 13% | 0.616 |
| NA                          | 19 | 18% | 44  | 23% | 28 | 41% |       |
| <b>+6p22</b>                |    |     |     |     |    |     |       |
| neg                         | 76 | 72% | 119 | 63% | 31 | 45% |       |
| pos                         | 11 | 10% | 26  | 14% | 10 | 14% | 0.251 |
| NA                          | 19 | 18% | 44  | 23% | 28 | 41% |       |
| <b>+7p22</b>                |    |     |     |     |    |     |       |
| neg                         | 68 | 64% | 130 | 69% | 27 | 39% |       |
| pos                         | 19 | 18% | 15  | 8%  | 14 | 20% | 0.001 |
| NA                          | 19 | 18% | 44  | 23% | 28 | 41% |       |
| <b>+7q21</b>                |    |     |     |     |    |     |       |
| neg                         | 66 | 62% | 129 | 68% | 30 | 43% |       |
| pos                         | 21 | 20% | 16  | 8%  | 11 | 16% | 0.008 |
| NA                          | 19 | 18% | 44  | 23% | 28 | 41% |       |
| <b>+8q24</b>                |    |     |     |     |    |     |       |
| neg                         | 79 | 75% | 135 | 71% | 33 | 48% |       |
| pos                         | 8  | 8%  | 10  | 5%  | 8  | 12% | 0.064 |
| NA                          | 19 | 18% | 44  | 23% | 28 | 41% |       |
| <b>+9q33</b>                |    |     |     |     |    |     |       |

|                    |    |     |     |     |    |     |        |
|--------------------|----|-----|-----|-----|----|-----|--------|
| neg                | 79 | 75% | 134 | 71% | 35 | 51% |        |
| pos                | 8  | 8%  | 11  | 6%  | 6  | 9%  | 0.401  |
| NA                 | 19 | 18% | 44  | 23% | 28 | 41% |        |
| <b>+11q12</b>      |    |     |     |     |    |     |        |
| neg                | 72 | 68% | 128 | 68% | 35 | 51% |        |
| pos                | 15 | 14% | 17  | 9%  | 6  | 9%  | 0.487  |
| NA                 | 19 | 18% | 44  | 23% | 28 | 41% |        |
| <b>+11q23.1</b>    |    |     |     |     |    |     |        |
| neg                | 66 | 62% | 129 | 68% | 35 | 51% |        |
| pos                | 21 | 20% | 16  | 8%  | 6  | 9%  | 0.033  |
| NA                 | 19 | 18% | 44  | 23% | 28 | 41% |        |
| <b>+11q23.3</b>    |    |     |     |     |    |     |        |
| neg                | 60 | 57% | 118 | 62% | 31 | 45% |        |
| pos                | 27 | 25% | 27  | 14% | 10 | 14% | 0.094  |
| NA                 | 19 | 18% | 44  | 23% | 28 | 41% |        |
| <b>+12q13</b>      |    |     |     |     |    |     |        |
| neg                | 69 | 65% | 122 | 65% | 34 | 49% |        |
| pos                | 18 | 17% | 23  | 12% | 7  | 10% | 0.64   |
| NA                 | 19 | 18% | 44  | 23% | 28 | 41% |        |
| <b>+18q21</b>      |    |     |     |     |    |     |        |
| neg                | 51 | 48% | 118 | 62% | 30 | 43% |        |
| pos                | 36 | 34% | 27  | 14% | 11 | 16% | <0.001 |
| NA                 | 19 | 18% | 44  | 23% | 28 | 41% |        |
| <b>+19q13</b>      |    |     |     |     |    |     |        |
| neg                | 70 | 66% | 134 | 71% | 37 | 54% |        |
| pos                | 17 | 16% | 11  | 6%  | 4  | 6%  | 0.026  |
| NA                 | 19 | 18% | 44  | 23% | 28 | 41% |        |
| <b>+Xq21</b>       |    |     |     |     |    |     |        |
| neg                | 69 | 65% | 111 | 59% | 31 | 45% |        |
| pos                | 14 | 13% | 27  | 14% | 7  | 10% | 0.904  |
| NA                 | 23 | 22% | 51  | 27% | 31 | 45% |        |
| <b>-6q21</b>       |    |     |     |     |    |     |        |
| neg                | 51 | 48% | 118 | 62% | 30 | 43% |        |
| pos                | 36 | 34% | 27  | 14% | 11 | 16% | <0.001 |
| NA                 | 19 | 18% | 44  | 23% | 28 | 41% |        |
| <b>-6q23</b>       |    |     |     |     |    |     |        |
| neg                | 55 | 52% | 118 | 62% | 33 | 48% |        |
| pos                | 32 | 30% | 27  | 14% | 8  | 12% | 0.007  |
| NA                 | 19 | 18% | 44  | 23% | 28 | 41% |        |
| <b>-8p23</b>       |    |     |     |     |    |     |        |
| neg                | 73 | 69% | 135 | 71% | 34 | 49% |        |
| pos                | 14 | 13% | 10  | 5%  | 7  | 10% | 0.039  |
| NA                 | 19 | 18% | 44  | 23% | 28 | 41% |        |
| <b>-9p21</b>       |    |     |     |     |    |     |        |
| neg                | 70 | 66% | 131 | 69% | 31 | 45% |        |
| pos                | 17 | 16% | 14  | 7%  | 10 | 14% | 0.02   |
| NA                 | 19 | 18% | 44  | 23% | 28 | 41% |        |
| <b>-17p13</b>      |    |     |     |     |    |     |        |
| neg                | 66 | 62% | 137 | 72% | 31 | 45% |        |
| pos                | 21 | 20% | 8   | 4%  | 10 | 14% | <0.001 |
| NA                 | 19 | 18% | 44  | 23% | 28 | 41% |        |
| <b>-Xp22</b>       |    |     |     |     |    |     |        |
| neg                | 76 | 72% | 126 | 67% | 37 | 54% |        |
| pos                | 7  | 7%  | 12  | 6%  | 1  | 1%  | 0.553  |
| NA                 | 23 | 22% | 51  | 27% | 31 | 45% |        |
| <b>Age &gt; 45</b> |    |     |     |     |    |     |        |
| neg                | 14 | 13% | 45  | 24% | 10 | 14% |        |
| pos                | 92 | 87% | 144 | 76% | 59 | 86% | 0.053  |
| <b>Age &gt; 60</b> |    |     |     |     |    |     |        |

|                                                                                                                                                                                                                                                                                                                                                                                                                                                                    |    |     |     |     |    |     |       |
|--------------------------------------------------------------------------------------------------------------------------------------------------------------------------------------------------------------------------------------------------------------------------------------------------------------------------------------------------------------------------------------------------------------------------------------------------------------------|----|-----|-----|-----|----|-----|-------|
| neg                                                                                                                                                                                                                                                                                                                                                                                                                                                                | 34 | 32% | 90  | 48% | 33 | 48% |       |
| pos                                                                                                                                                                                                                                                                                                                                                                                                                                                                | 72 | 68% | 99  | 52% | 36 | 52% | 0.023 |
| <b>HISTONE MODIFICATION</b>                                                                                                                                                                                                                                                                                                                                                                                                                                        |    |     |     |     |    |     |       |
| <b>H3K4me2</b>                                                                                                                                                                                                                                                                                                                                                                                                                                                     |    |     |     |     |    |     |       |
| neg                                                                                                                                                                                                                                                                                                                                                                                                                                                                | 0  | 0%  | 0   | 0%  | 1  | 1%  |       |
| pos                                                                                                                                                                                                                                                                                                                                                                                                                                                                | 25 | 24% | 57  | 30% | 20 | 29% |       |
| NA                                                                                                                                                                                                                                                                                                                                                                                                                                                                 | 81 | 76% | 132 | 70% | 48 | 70% | 0.204 |
| <b>H3K27me3</b>                                                                                                                                                                                                                                                                                                                                                                                                                                                    |    |     |     |     |    |     |       |
| neg                                                                                                                                                                                                                                                                                                                                                                                                                                                                | 0  | 0%  | 1   | 1%  | 0  | 0%  |       |
| pos                                                                                                                                                                                                                                                                                                                                                                                                                                                                | 8  | 8%  | 19  | 10% | 5  | 7%  |       |
| NA                                                                                                                                                                                                                                                                                                                                                                                                                                                                 | 98 | 92% | 169 | 89% | 64 | 93% | 1     |
| <b>H3K18ac</b>                                                                                                                                                                                                                                                                                                                                                                                                                                                     |    |     |     |     |    |     |       |
| neg                                                                                                                                                                                                                                                                                                                                                                                                                                                                | 0  | 0%  | 2   | 1%  | 3  | 4%  |       |
| pos                                                                                                                                                                                                                                                                                                                                                                                                                                                                | 38 | 36% | 60  | 32% | 23 | 33% |       |
| NA                                                                                                                                                                                                                                                                                                                                                                                                                                                                 | 68 | 64% | 127 | 67% | 43 | 62% | 0.074 |
| <p>The p-values were computed using the Fisher's exact test. GCB/ABC: germinal center B-cell, activated B-cell lymphoma gene expression signatures; GEP: gene expression profiling; PAP ("pathway activation pattern"): classification according to Bentink et al (2008). The categories of the data on histone modifications are defined by 0% = negative, &gt;0% = positive. See File S2 for the definitions of the categories of the other characteristics.</p> |    |     |     |     |    |     |       |
